# Supplementary material for: One-step self-assembly of ZnPc/NaGdF4:Yb,Er nanoclusters for simultaneous fluorescence imaging and photodynamic effects on cancer cells
Source: Royal Society of Chemistry journal article supplement (doi:10.1039/c3tb20533a), 2013-01-01
Supplement: c3tb20533a.pdf [file c3tb20533a.pdf]

## One-step self-assembly of ZnPc/NaGdF<sub>4</sub>:Yb,Er nanoclusters for simultaneously fluorescence imaging and photodynamic effects on cancer cells

Xin Wang, Qingbin Zhang, Junwei Zhao, Jianwu Dai

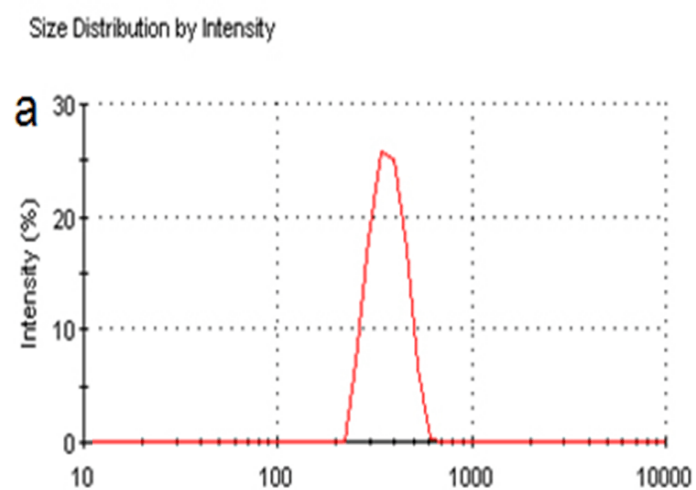

Figure S1. Hydrodynamic size distribution of the ZnPc/NaGdF<sub>4</sub>:Yb/Er nanoclusters measured by DLS

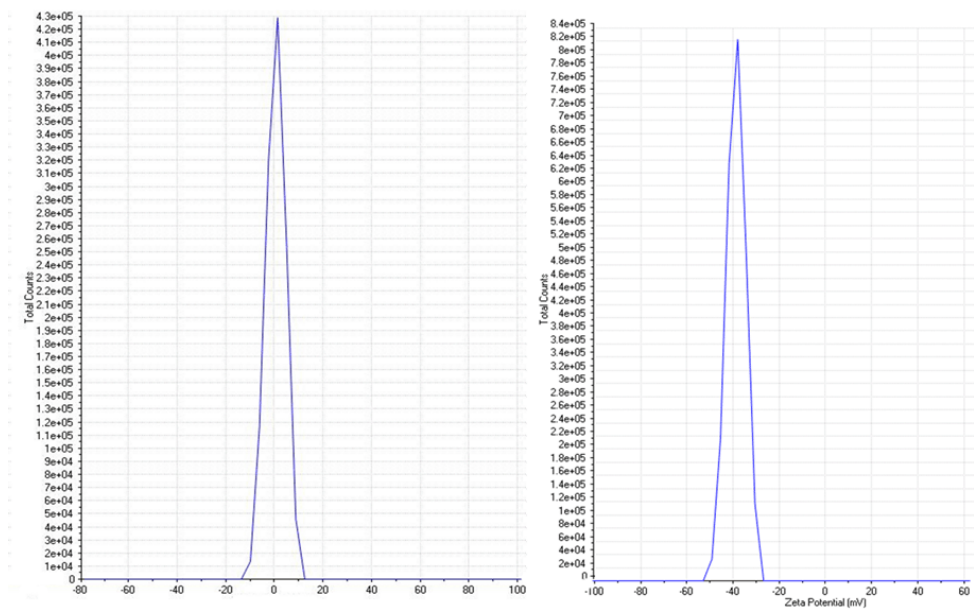

Figure S2. Zeta potential of ZnPc/NaGdF<sub>4</sub>:Yb/Er nanoclusters solidified by copolymer PMAO-PEG (left) and single polymer PMAO (right)
